# Supplementary material
Source: MDPI journal article supplement (https://www.mdpi.com/2313-433X/4/1/21)
Supplement: s2 [file s2]

# Hot Shoes in the Room: Authentication of Thermal Imaging for Quantitative Forensic Analysis

Justin H. J. Chua, Adrian G. Dyer and Jair E. Garcia \*

January 15, 2018

Bio Inspired Digital Sensing (BIDS) Lab, School of Media and Communication, RMIT University, Melbourne 3000, Australia; chua.heng.jie.justin@gmail.com (J.H.J.C.); adrian.dyer@rmit.edu.au (A.G.D.)

\* Correspondence: jair.garcia@rmit.edu.au

## Supplementary Material: Coefficients of Beta distributions describing pixel values at different intensity levels

**Table 1:** Shape parameters ( $v$  and  $\omega$ ) defining a beta distribution describing the probability of obtaining different pixel values ( $\rho$ ) at various intensity levels for the Fuji shoe. Mean  $\rho$  value for each intensity level was calculated from the corresponding shape parameters [1].

| pixel intensity level ( $\rho$ ) | Shape parameters                                                     | Mean   |
|----------------------------------|----------------------------------------------------------------------|--------|
| $\rho = 40$                      | $v = 4066.1(2832.7, 6363.0)$<br>$\omega = 19506.2(13611.6, 30515.5)$ | 43.99  |
| $\rho = 45$                      | $v = 791.4(662.9, 983.3)$<br>$\omega = 3476.2(2904.2, 4331.2)$       | 47.29  |
| $\rho = 50$                      | $v = 1385.8(1200.8, 1640.8)$<br>$\omega = 5269.2(4576.0, 6229.6)$    | 53.10  |
| $\rho = 55$                      | $v = 1541.9(1389.7, 1728.8)$<br>$\omega = 5304.8(4778.9, 5948.9)$    | 57.43  |
| $\rho = 60$                      | $v = 1547.2(1366.0, 1782.3)$<br>$\omega = 4789.2(4225.1, 5520.8)$    | 62.27  |
| $\rho = 65$                      | $v = 1538.0(1326.1, 1816.8)$<br>$\omega = 4287.8(3696.4, 5070.7)$    | 67.32  |
| $\rho = 70$                      | $v = 1776.7(1485.2, 2196.2)$<br>$\omega = 4486.8(3751.8, 5551.7)$    | 72.33  |
| $\rho = 75$                      | $v = 1964.4(1514.2, 2713.1)$<br>$\omega = 4509.9(3468.1, 6233.8)$    | 77.37  |
| $\rho = 80$                      | $v = 2957.4(2202.0, 4198.9)$<br>$\omega = 6211.9(4623.7, 8816.6)$    | 82.25  |
| $\rho = 85$                      | $v = 2407.0(1885.4, 3269.2)$<br>$\omega = 4606.4(3603.3, 6265.3)$    | 87.52  |
| $\rho = 90$                      | $v = 3839.8(2652.6, 7055.0)$<br>$\omega = 6714.2(4650.1, 12261.4)$   | 92.78  |
| $\rho = 95$                      | $v = 3065.3(2040.7, 5682.7)$<br>$\omega = 4955.6(3292.9, 9247.6)$    | 97.45  |
| $\rho = 100$                     | $v = 645.5(449.0, 1155.6)$<br>$\omega = 930.8(643.5, 1693.8)$        | 104.42 |

**Table 2:** Shape parameters ( $v$  and  $\omega$ ) defining a beta distribution describing the probability of obtaining different pixel values ( $\rho$ ) at various intensity levels for the leather shoe. Mean  $\rho$  value for each intensity level was calculated from the corresponding shape parameters [1].

| <b>pixel intensity level (<math>\rho</math>)</b> | <b>Shape parameters</b>                                               | <b>Mean</b> |
|--------------------------------------------------|-----------------------------------------------------------------------|-------------|
| $\rho = 40$                                      | $v = 2812.1$ (1955.0, 4814.3)<br>$\omega = 13582.7$ (9461.0, 23105.5) | 43.74       |
| $\rho = 45$                                      | $v = 875.3$ (748.8, 1059.0)<br>$\omega = 3791.7$ (3254.0, 4566.3)     | 47.82       |
| $\rho = 50$                                      | $v = 1110.8$ (1005.7, 1233.8)<br>$\omega = 4269.0$ (3867.1, 4739.0)   | 52.65       |
| $\rho = 55$                                      | $v = 1352.6$ (1213.4, 1522.9)<br>$\omega = 4657.1$ (4179.6, 5240.6)   | 57.39       |
| $\rho = 60$                                      | $v = 1597.9$ (1403.7, 1849.2)<br>$\omega = 4960.0$ (4352.2, 5751.3)   | 62.13       |
| $\rho = 65$                                      | $v = 1587.0$ (1365.8, 1885.2)<br>$\omega = 4435.3$ (3816.5, 5278.7)   | 67.20       |
| $\rho = 70$                                      | $v = 1934.4$ (1561.8, 2495.1)<br>$\omega = 4869.6$ (3932.5, 6280.7)   | 72.50       |
| $\rho = 75$                                      | $v = 2385.0$ (1760.2, 3506.2)<br>$\omega = 5477.5$ (4041.3, 8057.1)   | 77.35       |
| $\rho = 80$                                      | $v = 1893.5$ (1400.1, 2928.1)<br>$\omega = 3972.0$ (2927.4, 6167.4)   | 82.31       |
| $\rho = 85$                                      | $v = 3120.0$ (2088.5, 5816.1)<br>$\omega = 6015.6$ (4010.7, 11267.3)  | 87.09       |
| $\rho = 90$                                      | $v = 511.6$ (272.1, 2554.5)<br>$\omega = 876.9$ (452.8, 4481.2)       | 93.95       |

**Table 3:** Shape parameters ( $v$  and  $\omega$ ) defining a beta distribution describing the probability of obtaining different pixel values ( $\rho$ ) at various intensity levels for the Cumulus shoe. Mean  $\rho$  value for each intensity level was calculated from the corresponding shape parameters [1].

| pixel intensity level ( $\rho$ ) | Shape parameters                                                         | Mean   |
|----------------------------------|--------------------------------------------------------------------------|--------|
| $\rho = 40$                      | $v = 8536.1$ (5341.3, 33648.6)<br>$\omega = 40537.0$ (25409.3, 158498.2) | 44.36  |
| $\rho = 45$                      | $v = 836.0$ (726.0, 972.5)<br>$\omega = 3657.7$ (3177.8, 4254.6)         | 47.44  |
| $\rho = 50$                      | $v = 1312.9$ (1184.0, 1473.8)<br>$\omega = 5018.3$ (4523.6, 5623.5)      | 52.88  |
| $\rho = 55$                      | $v = 1261.5$ (1137.4, 1419.1)<br>$\omega = 4377.9$ (3942.4, 4931.5)      | 57.04  |
| $\rho = 60$                      | $v = 1464.3$ (1256.6, 1735.2)<br>$\omega = 4519.0$ (3874.7, 5359.7)      | 62.41  |
| $\rho = 65$                      | $v = 1560.4$ (1298.0, 1946.8)<br>$\omega = 4342.6$ (3605.6, 5429.8)      | 67.41  |
| $\rho = 70$                      | $v = 2100.2$ (1671.7, 2769.2)<br>$\omega = 5316.5$ (4232.7, 7029.1)      | 72.21  |
| $\rho = 75$                      | $v = 1710.4$ (1394.4, 2208.1)<br>$\omega = 3935.0$ (3205.9, 5085.2)      | 77.26  |
| $\rho = 80$                      | $v = 2784.0$ (2088.9, 3937.4)<br>$\omega = 5832.2$ (4377.2, 8271.2)      | 82.39  |
| $\rho = 85$                      | $v = 2740.3$ (1986.5, 4190.9)<br>$\omega = 5243.0$ (3801.5, 8023.6)      | 87.53  |
| $\rho = 90$                      | $v = 3116.1$ (2226.3, 4951.0)<br>$\omega = 5473.5$ (3907.9, 8739.4)      | 92.51  |
| $\rho = 95$                      | $v = 3069.2$ (2245.5, 4856.6)<br>$\omega = 4972.6$ (3640.1, 7858.0)      | 97.32  |
| $\rho = 100$                     | $v = 791.5$ (487.3, 1810.7)<br>$\omega = 1153.1$ (703.9, 2683.6)         | 103.79 |

## References

1. Gaussorgues, G. *Infrared Thermography*; Chapman & Hall: London, UK, 1994.
